# Supplementary material for: Multi-Channel Multiphase CT-Based Deep Learning and Radiomics Fusion Model for Noninvasive Pathological Grading of Clear Cell Renal Cell Carcinoma
Source: Research Square preprint supplement (doi:10.21203/rs.3.rs-7430046/v1), 2025-09-08
Supplement: Supplementary file 1 [file 1c1a5953cd48d264b2d184bd.docx]

| feature_name | train-label=ALL | train-label=0 | train-label=1 | pvalue | test-label=ALL | test-label=0 | test-label=1 | pvalue |
| --- | --- | --- | --- | --- | --- | --- | --- | --- |
| Age | 60.89±10.06 | 59.64±10.64 | 63.10±8.56 | 0.011 | 59.28±9.72 | 58.43±9.98 | 60.73±9.15 | 0.164 |
| Gender |  |  |  | 0.381 |  |  |  | 0.004 |
| 0 | 227(65.42) | 141(63.51) | 86(68.80) |  | 93(62.42) | 50(53.19) | 43(78.18) |  |
| 1 | 120(34.58) | 81(36.49) | 39(31.20) |  | 56(37.58) | 44(46.81) | 12(21.82) |  |
| Hematuria |  |  |  | <0.001 |  |  |  | 0.002 |
| 0 | 306(88.18) | 206(92.79) | 100(80.00) |  | 125(83.89) | 86(91.49) | 39(70.91) |  |
| 1 | 41(11.82) | 16(7.21) | 25(20.00) |  | 24(16.11) | 8(8.51) | 16(29.09) |  |
| Lumbago |  |  |  | 0.295 |  |  |  | 0.517 |
| 0 | 241(69.45) | 159(71.62) | 82(65.60) |  | 101(67.79) | 66(70.21) | 35(63.64) |  |
| 1 | 106(30.55) | 63(28.38) | 43(34.40) |  | 48(32.21) | 28(29.79) | 20(36.36) |  |
| Calcification |  |  |  | 0.003 |  |  |  | 0.121 |
| 0 | 299(86.17) | 201(90.54) | 98(78.40) |  | 129(86.58) | 85(90.43) | 44(80.00) |  |
| 1 | 48(13.83) | 21(9.46) | 27(21.60) |  | 20(13.42) | 9(9.57) | 11(20.00) |  |
| Necrosis |  |  |  | 0.003 |  |  |  | 0.004 |
| 0 | 101(29.11) | 77(34.68) | 24(19.20) |  | 53(35.57) | 42(44.68) | 11(20.00) |  |
| 1 | 246(70.89) | 145(65.32) | 101(80.80) |  | 96(64.43) | 52(55.32) | 44(80.00) |  |
| Intertumoral_artery |  |  |  | 0.002 |  |  |  | <0.001 |
| 0 | 190(54.76) | 136(61.26) | 54(43.20) |  | 88(59.06) | 75(79.79) | 13(23.64) |  |
| 1 | 157(45.24) | 86(38.74) | 71(56.80) |  | 61(40.94) | 19(20.21) | 42(76.36) |  |
