# Supplementary material for: Multi-Channel Multiphase CT-Based Deep Learning and Radiomics Fusion Model for Noninvasive Pathological Grading of Clear Cell Renal Cell Carcinoma
Source: Research Square preprint supplement (doi:10.21203/rs.3.rs-7430046/v1), 2025-09-08
Supplement: Supplementary file 3 [file c7dd39e10e0bd29c0cc6b81b.docx]

| Signature | Accuracy | AUC | 95% CI | Sensitivity | Specificity | PPV | NPV | Cohort |
| --- | --- | --- | --- | --- | --- | --- | --- | --- |
| crop | 0.767 | 0.726 | 0.6667 - 0.7844 | 0.608 | 0.768 | 0.879 | 0.744 | train |
| crop-enlarge | 0.775 | 0.791 | 0.7401 - 0.8424 | 0.772 | 0.833 | 0.694 | 0.819 | train |
| crop-roi-only | 0.784 | 0.745 | 0.6853 - 0.8050 | 0.628 | 0.828 | 0.805 | 0.777 | train |
| crop | 0.711 | 0.711 | 0.6221 - 0.7999 | 0.636 | 0.755 | 0.603 | 0.78 | test |
| crop-enlarge | 0.718 | 0.78 | 0.7004 - 0.8598 | 0.745 | 0.702 | 0.594 | 0.825 | test |
| crop-roi-only | 0.779 | 0.741 | 0.6527 - 0.8286 | 0.709 | 0.836 | 0.824 | 0.765 | test |
