# Supplementary material for: Multi-Channel Multiphase CT-Based Deep Learning and Radiomics Fusion Model for Noninvasive Pathological Grading of Clear Cell Renal Cell Carcinoma
Source: Research Square preprint supplement (doi:10.21203/rs.3.rs-7430046/v1), 2025-09-08
Supplement: Supplementary file 4 [file d11b7f16afdeea4b7f4a6215.docx]

| feature_name | OR_UNI | OR lower 95%CI_UNI | OR upper 95%CI_UNI | p_value_UNI | OR_MULTI | OR lower 95%CI_MULTI | OR upper 95%CI_MULTI | p_value_MULTI |
| --- | --- | --- | --- | --- | --- | --- | --- | --- |
| Gender | 0.481 | 0.35 | 0.664 | 0 | 0.722 | 0.488 | 1.067 | 0.171 |
| Lumbago | 0.683 | 0.493 | 0.945 | 0.054 |  |  |  |  |
| Necrosis | 0.697 | 0.563 | 0.862 | 0.005 | 1.616 | 1.077 | 2.425 | 0.052 |
| Intertumoral_artery | 0.826 | 0.634 | 1.075 | 0.232 |  |  |  |  |
| Age | 0.992 | 0.989 | 0.995 | 0 | 0.988 | 0.982 | 0.994 | 0.001 |
| Calcification | 1.286 | 0.797 | 2.075 | 0.388 |  |  |  |  |
| Hematuria | 1.563 | 0.923 | 2.646 | 0.163 |  |  |  |  |
